# Supplementary material for: New Perspective for Using Antimicrobial and Cell-Penetrating Peptides to Increase Efficacy of Antineoplastic 5-FU in Cancer Cells
Source: MDPI journal article supplement (doi:10.3390/jfb14120565), 2023-12-12
Supplement: s1 [file s1]

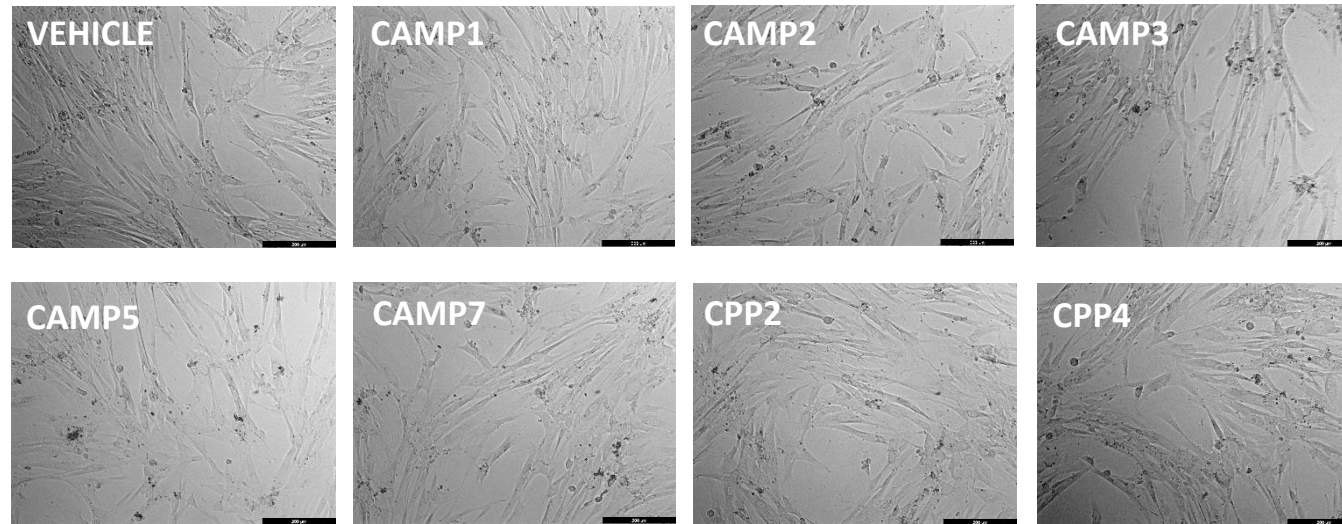

**Figure S1.** Morphological evaluation of MRC-5 cells treated with Peptides CAMP1, CAMP2, CAMP3, CAMP5, CAMP7, CPP2 and CPP4. Cells were treated with vehicle (DMSO) and 50  $\mu$ M of each peptide for 72 h. Results are representative of three independent experiments. Scale bar: 200  $\mu$ m.
